# Supplementary material for: Simultaneous determination of 15 phthalate esters in commercial beverages using dispersive liquid–liquid microextraction coupled to gas chromatography-mass spectrometry
Source: Royal Society of Chemistry journal article supplement (doi:10.1039/c7ay00123a), 2017-01-01
Supplement: c7ay00123a1.pdf [file c7ay00123a1.pdf]

### Supplementary Materials

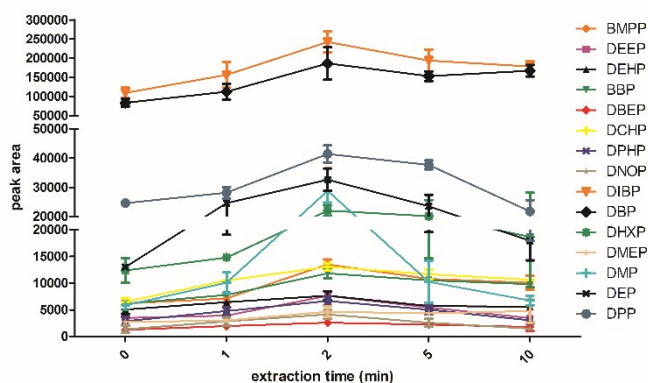

Fig. S1 Effect of the extraction time on the extraction efficiency in DLLME Extraction conditions: water sample volume, 5.0 mL; extraction solvent (carbon tetrachloride), 50  $\mu$ L; disperser solvent (methanol) volume, 1.0 mL; concentration of each phthalate ester, 0.02  $\mu$ g mL<sup>-1</sup>.

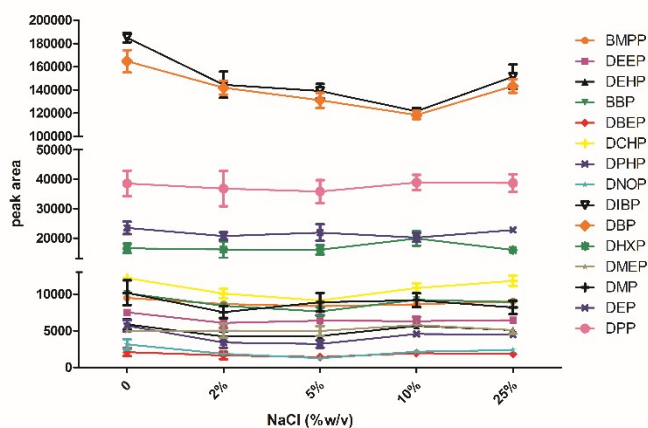

Fig. S2 Effect of salt addition on the extraction efficiency in DLLME Extraction conditions: water sample volume, 5.0 mL; extraction solvent (carbon tetrachloride), 50  $\mu$ L; disperser solvent (methanol) volume, 1.0 mL; concentration of each phthalate ester, 0.02  $\mu$ g mL<sup>-1</sup>.
